# Supplementary material for: Modification of vitamin B6 on the associations of blood lead levels and cardiovascular diseases in the US adults
Source: PubMed Central journal article supplement — BMJ Nutr Prev Health. 2020 Aug 12;3(2):180–7. doi: 10.1136/bmjnph-2020-000088 (PMC7841818; doi:10.1136/bmjnph-2020-000088), 2020-08-12
Supplement: bmjnph-2020-000088supp001.pdf [file bmjnph-2020-000088supp001.pdf]

Supplementary Table. Baseline characteristics, mean BLL and vitamin B6 (plasma PLP) levels by covariates (weighted)

| Characteristics                          | N(%)       | BLL mean±SE (ug/dL) | Plasma PLP mean±SE (nmol/L) |
|------------------------------------------|------------|---------------------|-----------------------------|
| <b>Overall</b>                           | 4482(100)  | 1.75 ±0.04          | 76.2±2.6                    |
| <b>CVD</b>                               |            |                     |                             |
| Yes                                      | 497(12.9)  | 2.41±0.07           | 68.1±6.2                    |
| No                                       | 3985(87.1) | 1.69±0.04           | 77.0±2.5                    |
| <b>Age(y)</b>                            |            |                     |                             |
| 20-40                                    | 1697(37.1) | 1.27±0.04           | 74.8±3.6                    |
| 40-60                                    | 1377(39.7) | 1.83±0.05           | 75.8±3.7                    |
| 60-80                                    | 1081(19.0) | 2.35±1.00           | 79.7±3.3                    |
| 80+                                      | 327(4.2)   | 2.75±0.12           | 76.4±6.5                    |
| <b>Gender</b>                            |            |                     |                             |
| Female                                   | 2330(52.0) | 1.46±0.03           | 71.9±2.2                    |
| Male                                     | 2152(48.0) | 2.08±0.07           | 81.0±4.0                    |
| <b>Ethnicity</b>                         |            |                     |                             |
| Mexican American                         | 911(8.0)   | 1.91±0.10           | 65.5±2.3                    |
| Other Hispanic                           | 136(3.3)   | 1.62± 0.17          | 70.3±4.5                    |
| White (non-Hispanic)                     | 2263(72.5) | 1.72±0.06           | 80.8±3.5                    |
| Black (non-Hispanic)                     | 999(11.1)  | 1.90±0.08           | 56.7±3.7                    |
| Other                                    | 173(5.1)   | 1.71±0.14           | 73.7±4.5                    |
| <b>Education</b>                         |            |                     |                             |
| Less than 9th grade                      | 553(6.4)   | 2.41±0.12           | 59.0±3.4                    |
| 9th - 11th grade                         | 691(11.2)  | 2.15±0.07           | 54.5±3.3                    |
| High school graduate                     | 1056(24.8) | 1.84±0.06           | 69.6±3.1                    |
| Some college or associate's degree       | 1283(31.4) | 1.62±0.05           | 76.0±2.6                    |
| College graduate and above               | 894(26.2)  | 1.50±0.05           | 96.5±6.3                    |
| N/A                                      | 5          |                     |                             |
| <b>Family Poverty Income Ratio (PIR)</b> |            |                     |                             |
| 0-1.85                                   | 1668(27.1) | 1.98±0.05           | 58.4±1.8                    |
| 1.86-3.50                                | 1158(28.2) | 1.82±0.07           | 74.2±4.7                    |
| >3.50                                    | 1455(44.7) | 1.56±0.04           | 87.4±3.5                    |
| N/A                                      | 201        |                     |                             |
| <b>Smoking</b>                           |            |                     |                             |
| Never smoker                             | 2358(51.1) | 1.53±0.04           | 82.2±3.0                    |
| Past smoker                              | 1138(25.0) | 1.90±0.06           | 82.1±4.5                    |
| Current smoker                           | 984(23.9)  | 2.08±0.08           | 57.5±2.9                    |
| N/A                                      | 2          |                     |                             |
| <b>Alcohol Use</b>                       |            |                     |                             |
| Never drinker                            | 584(11.1)  | 1.62±0.08           | 66.8±3.4                    |
| Past drinker                             | 891(17.4)  | 1.87±0.06           | 81.3±6.3                    |
| Current drinker light                    | 912(24.2)  | 1.65±0.06           | 80.4±3.8                    |
| Current drinker heavy                    | 1775(47.3) | 1.79±0.06           | 76.2±3.0                    |
| N/A                                      | 320        |                     |                             |
| <b>BMI</b>                               |            |                     |                             |
| Underweight                              | 72(1.7)    | 2.05±0.12           | 63.3±7.4                    |
| Normal                                   | 1260(31.0) | 1.76±0.07           | 85.7±3.9                    |
| Overweight                               | 1516(33.9) | 1.86±0.06           | 87.5±5.0                    |

|                             |            |           |           |
|-----------------------------|------------|-----------|-----------|
| Obesity                     | 1561(34.4) | 1.62±0.05 | 58.5±2.8  |
| N/A                         | 73         |           |           |
| <b>Activity per week(h)</b> |            |           |           |
| Sedentary                   | 820(13.6)  | 2.07±0.04 | 53.9±2.7  |
| Low                         | 1256(26.5) | 1.74±0.05 | 72.2±3.2  |
| Moderate                    | 1227(30.1) | 1.62±0.07 | 77.3±4.0  |
| High                        | 1179(29.8) | 1.77±0.05 | 88.9±4.1  |
| <b>Supplement use</b>       |            |           |           |
| Yes                         | 2266(54.3) | 1.71±0.05 | 101.5±3.8 |
| No                          | 2213(45.7) | 1.81±0.05 | 46.3±1.7  |
| N/A                         | 3          |           |           |
| <b>Sleep</b>                |            |           |           |
| Less than 7 hours           | 1684(35.6) | 1.78±0.04 | 68.9±2.8  |
| 7-8 hours                   | 2424(57.2) | 1.75±0.06 | 81.9±3.9  |
| 8+ hours                    | 364(7.2)   | 1.71±0.05 | 67.8±5.2  |
| N/A                         | 10         |           |           |
| <b>Depression</b>           |            |           |           |
| No                          | 3276(80.1) | 1.75±0.05 | 79.9±2.5  |
| Mild                        | 595(14.3)  | 1.71±0.05 | 72.0±7.3  |
| Moderate-severe             | 266(5.6)   | 1.78±0.10 | 50.6±5.5  |
| N/A                         | 345        |           |           |
| <b>Hypertension</b>         |            |           |           |
| Yes                         | 1740(36.3) | 2.06±0.05 | 73.0±2.6  |
| No                          | 2742(63.7) | 1.58±0.05 | 78.1±3.2  |
| N/A                         | 5          |           |           |
| <b>Diabetes</b>             |            |           |           |
| Yes                         | 533(9.5)   | 1.80±0.06 | 58.9±3.3  |
| No                          | 3949(90.5) | 1.75±0.05 | 78.0±2.9  |
| N/A                         | 5          |           |           |
| <b>C-Reactive Protein</b>   |            |           |           |
| Tertile 1                   | 1539(39.0) | 1.72±0.05 | 91.9±3.2  |
| Tertile 2                   | 1484(33.0) | 1.90±0.07 | 72.2±3.1  |
| Tertile 3                   | 1454(28.0) | 1.64±0.04 | 59.3±3.4  |
| N/A                         | 5          |           |           |
| <b>Homocysteine</b>         |            |           |           |
| Tertile 1                   | 1489(31.7) | 1.22±0.03 | 81.4±3.5  |
| Tertile 2                   | 1486(37.2) | 1.75±0.05 | 81.4±5.3  |
| Tertile 3                   | 1486(31.2) | 2.30±0.06 | 65.6±2.7  |
| N/A                         | 21         |           |           |
| <b>Cholesterol</b>          |            |           |           |
| Tertile 1                   | 1527(33.1) | 1.71±0.08 | 67.2±3.2  |
| Tertile 2                   | 1450(34.0) | 1.76±0.05 | 85.9±4.8  |
| Tertile 3                   | 1491(32.9) | 1.80±0.03 | 75.2±2.3  |
| N/A                         | 14         |           |           |
